# Supplementary material for: A Cross-Sectional Survey of Salty Snack Consumption among Serbian Urban-Living Students and Their Contribution to Salt Intake
Source: PubMed Central journal article supplement (PMC7692209; doi:10.3390/nu12113290), 2020-10-27
Supplement: nutrients-12-03290-s001.pdf [file nutrients-12-03290-s001.pdf]

## Questionnaire used in the study

Four letter code :

### 1. General questions:

Gender:

Year of bearth:

University student

High-school student (circle the right answer)

Body mass (kg):

Body height (cm):

Examples of salt snack products (used in separate eating occasions): chips, flips, popcorn, fried corn, salted sticks, pretzels, crackers, fish-shaped products, roasted and baked nuts, seeds, and salty peanuts.

### 2. How often do you consume salty snack products?

never      1-3 x month      1 nedeljno      2-4 x week      1 daily      several times per day

### 3. Where do you most often consume salty snacks?

At home      At school /Faculty      Outdoors

### 4. What is your preferable salty snack products? (write the snack type)

### 5. When do you usually consume salty snacks?

A. Before the main meal

During the main meal

Immediately after the main meal

Instead of the main meal

Between the main meals

B. What is your preferable part of day for salty snack consumption?

In the morning      Never      Sometimes      Often

In the afternoon      Never      Sometimes      Often

In the evening      Never      Sometimes      Often

### 6. What is the main characteristic that attracts you to these products?

Taste      Satiety potential

Package      No other food available at the moment

Crunchiness      Commercials

Easy availability      Other reasons (write them please)

### 7. Do you pay attention to the nutritive value of these products?

Yes, I read the information on the labels

No, I do not read information on the labels

### 8. Do you consume salty snack in front of TV or computer?

Often      Sometimes      Never

### 9. Do you often drink beverages with salty snacks?

No      Yes, soft drinks      Yes, drinks with alcohol

### 10. Do you change your habits in salty snacks consumption during periods of intensive learning?

No      Yes, I use them more      Yes, I use them less

### 11. How many daily meals do you usually have?

Main meals (write the number)

Refreshments (write the number)

### 12. What is your overall opinion about the quality of your diet?

Very badBad Good      Very good

**Supplementary Table S1.-** Descriptive characteristics of study participants.

| Parameter              | University students<br>N=806 | High school students<br>N=507 | p            |
|------------------------|------------------------------|-------------------------------|--------------|
| Age, years             | 23.0±2.4                     | 17.3±1.3                      | < .001       |
| Male                   | N=202 (25%)                  | N=160 (31.6%)                 | $\chi^2=6.8$ |
| Female                 | N=605 (75%)                  | N=346 (68.4%)                 | < .01        |
| BMI, kg/m <sup>2</sup> | 21.2±2.7                     | 20.8±2.5                      | < .01        |
| <25 kg/m <sup>2</sup>  | 91.4%                        | 94.7%                         |              |
| 25-30                  | 7.9%                         | 4.7%                          |              |
| >30                    | 0.7%                         | 0.6%                          |              |

*p* = ANOVA with post-hoc Tukey test, or Chi-square test.

**Supplementary Table S2. -** The rotated pattern matrix of the questionnaire scale. The four factors and their items.

| <b>1. Pattern of salty snack consumption</b>          |        |
|-------------------------------------------------------|--------|
| <b>Dominant place of salty snack consumption</b>      | 0.950  |
| Frequency of salty snack consumption                  | 0.911  |
| Time of salty snack consumption (regarding main meal) | 0.813  |
| SP type                                               | 0.787  |
| <b>2. Information about nutritive value</b>           |        |
| Information on food labels                            | 0.747  |
| <b>3. General dietary habits</b>                      |        |
| Number of main meals                                  | 0.821  |
| Number of refreshments                                | 0.720  |
| Eating with nonalcoholic or alcoholic beverages       | 0.595  |
| Eating in front of TV                                 | 0.384  |
| <b>4. Preferences</b>                                 |        |
| Faculty/high school                                   | 0.796  |
| Motivational reasons for salty snack consumption      | -0.561 |
| Day period related consumption                        | 0.342  |

**Supplementary Table S3.** Logistic regression analysis of the variables (questionnaire's items) that could predict a high level of salty snack product intake among the population of urban living students.

| Population<br>Parameter/Data            | All                             |             |                                      |                  | High-school students            |              |                                      |                  | University students             |              |                                       |                  |
|-----------------------------------------|---------------------------------|-------------|--------------------------------------|------------------|---------------------------------|--------------|--------------------------------------|------------------|---------------------------------|--------------|---------------------------------------|------------------|
|                                         | $\beta$ (SE)                    | Wald        | OR 95 <sup>th</sup> CI               | <i>p</i>         | $\beta$ (SE)                    | Wald         | OR 95 <sup>th</sup> CI               | <i>p</i>         | $\beta$ (SE)                    | Wald         | OR 95 <sup>th</sup> CI                | <i>p</i>         |
| Gender m/f                              | 0.016<br>(0.221)                | 0.01        | 1.016<br>(0.659-1.565)               | 0.943            | 0.268<br>(0.319)                | 0.70         | 1.307<br>(0.700-2.442)               | 0.401            | -0.189<br>(0.306)               | 0.382        | 0.828<br>(0.454-1.509)                | 0.537            |
| Age (years)                             | <b>-0.122</b><br><b>(0.031)</b> | <b>16.0</b> | <b>0.885</b><br><b>(0.833-0.939)</b> | <b>&lt;0.001</b> | -0.328<br>(0.111)               | 8.67         | 0.721<br>(0.579-0.896)               | 0.003            | -0.053<br>(0.060)               | 0.777        | 0.948<br>(0.843-1.067)                | 0.378            |
| BMI                                     | -0.024<br>(0.037)               | 0.424       | 0.976<br>(0.907-1.050)               | 0.515            | -0.042<br>(0.057)               | 0.54         | 0.959<br>(0.857-1.073)               | 0.464            | 0.010<br>(0.049)                | 0.044        | 1.010<br>(0.918-1.112)                | 0.834            |
| Type of snack products                  | <b>-0.320</b><br><b>(0.051)</b> | <b>32.5</b> | <b>0.780 (0.700-0.853)</b>           | <b>&lt;0.001</b> | <b>0.260</b><br><b>(0.064)</b>  | <b>22.4</b>  | <b>0.816</b><br><b>(0.796-0.856)</b> | <b>&lt;0.001</b> | <b>-0.374</b><br><b>(0.063)</b> | <b>18.5</b>  | <b>0.922</b><br><b>(0.867-0.980)</b>  | <b>&lt;0.001</b> |
| Awareness of SP intake                  | 0.507<br>(0.220)                | 5.3         | 1.660<br>(1.081-2.550)               | 0.021            | 0.192<br>(0.313)                | 0.38         | 1.212<br>(0.655-2.239)               | 0.540            | 0.688<br>(0.314)                | 4.81         | 1.991<br>(1.076-3.682)                | 0.028            |
| Morning consumption frequency           | <b>1.091</b><br><b>(0.174)</b>  | <b>39.4</b> | <b>2.98</b><br><b>(2.121-4.182)</b>  | <b>&lt;0.001</b> | <b>1.690</b><br><b>(0.286)</b>  | <b>35.18</b> | <b>5.464</b><br><b>(3.119-9.589)</b> | <b>&lt;0.001</b> | 0.729<br>(0.237)                | 9.47         | 2.074<br>(1.303-3.300)                | 0.002            |
| Midday consumption frequency            | <b>1.550</b><br><b>(0.191)</b>  | <b>56.7</b> | <b>4.71</b><br><b>(3.240-6.845)</b>  | <b>&lt;0.001</b> | <b>1.593</b><br><b>(0.285)</b>  | <b>31.23</b> | <b>4.916</b><br><b>(2.812-8.594)</b> | <b>&lt;0.001</b> | <b>1.498</b><br><b>(0.263)</b>  | <b>32.46</b> | <b>4.473</b><br><b>(2.672-7.490)</b>  | <b>&lt;0.001</b> |
| Evening consumption frequency           | <b>1.40</b><br><b>(0.177)</b>   | <b>63.0</b> | <b>4.074</b><br><b>(2.886-5.753)</b> | <b>&lt;0.001</b> | <b>1.056</b><br><b>(0.231)</b>  | <b>20.92</b> | <b>2.876</b><br><b>(1.829-4.522)</b> | <b>&lt;0.001</b> | <b>1.981</b><br><b>(0.302)</b>  | <b>43.03</b> | <b>7.252</b><br><b>(4.012-13.110)</b> | <b>&lt;0.001</b> |
| Motivational reasons                    | 0.001<br>(0.000)                | 1.74        | 1.000<br>(1.000-1.001)               | 0.187            | 0.001<br>(0.001)                | 1.35         | 1.001<br>(1.000-1.002)               | 0.245            | 0.000<br>(0.001)                | 0.01         | 1.000<br>(0.999-1.002)                | 0.932            |
| Number of main meals                    | 0.264<br>(0.168)                | 2.45        | 1.303<br>(0.936-1.812)               | 0.117            | 0.272<br>(0.247)                | 1.21         | 1.313<br>(0.809-2.131)               | 0.271            | 0.173<br>(0.253)                | 0.54         | 1.189<br>(0.749-1.885)                | 0.436            |
| Number of refreshments                  | <b>0.560</b><br><b>(0.097)</b>  | <b>33.4</b> | <b>1.751</b><br><b>(1.451-2.122)</b> | <b>&lt;0.001</b> | <b>0.473</b><br><b>(0.117)</b>  | <b>16.44</b> | <b>1.605</b><br><b>(1.277-2.018)</b> | <b>&lt;0.001</b> | 0.577<br>(0.185)                | 9.67         | 1.780<br>(1.238-2.561)                | 0.002            |
| Self-perception of overall diet quality | <b>-0.636</b><br><b>(0.161)</b> | <b>15.7</b> | <b>0.529</b><br><b>(0.386-0.725)</b> | <b>&lt;0.001</b> | <b>-1.011</b><br><b>(0.239)</b> | <b>17.96</b> | <b>0.364</b><br><b>(0.288-0.581)</b> | <b>&lt;0.001</b> | -0.313<br>(0.234)               | 1.78         | 0.732<br>(0.462-1.158)                | 0.182            |

\*SP = salty snack products; OR-odds ratio coefficient (95<sup>th</sup> CI- confidence interval).
